# Supplementary material
Source: PubMed Central journal article supplement (PMC5363202)
Supplement: mmc1.pdf [file mmc1.pdf]

YMTHE, Volume 25

## **Supplemental Information**

**Targeting the HDAC2/HNF-4A/miR-101b/AMPK**

**Pathway Rescues Tauopathy and Dendritic**

**Abnormalities in Alzheimer's Disease**

**Dan Liu, Hui Tang, Xin-Yan Li, Man-Fei Deng, Na Wei, Xiong Wang, Ya-Fan Zhou, Ding-Qi Wang, Peng Fu, Jian-Zhi Wang, Sébastien S. Hébert, Jian-Guo Chen, Youming Lu, and Ling-Qiang Zhu**

## Supplementary Figures

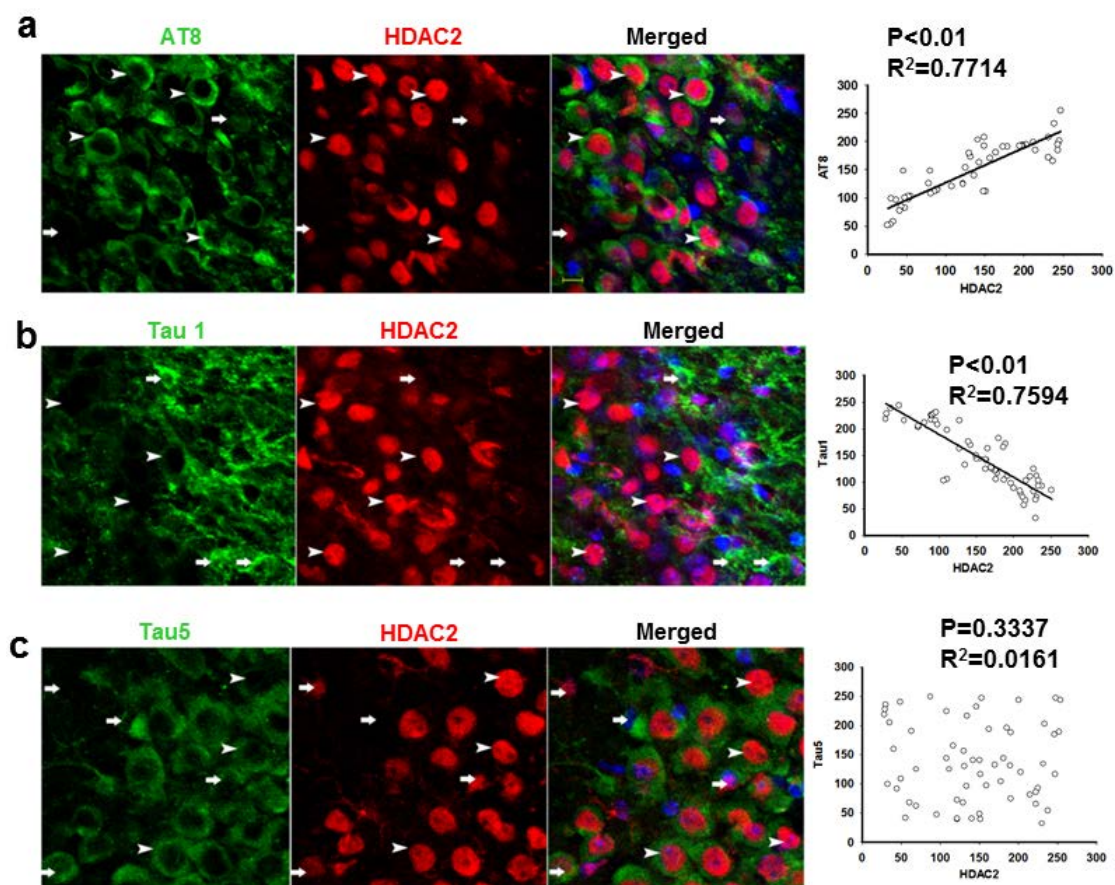

**Fig. S1. HDAC2 expression is correlated with tau phosphorylation in P301L Tau mice**

(a) The double immunofluorescence were performed in the 9-month P301L Tau mice hippocampal slices by using the AT8 (Green) and HDAC2 (Red) antibodies and the correlation analysis was performed by Sigmaplot after the fluorescent intensity measurement by Image J. Arrowhead, neurons with high level of HDAC2 intensity; Arrow, neurons with low level of HDAC2 intensity. N=52.

(b) The double immunofluorescence were performed in the 9-month P301L Tau mice hippocampal slices by using the Tau1 (Green) and HDAC2 (Red) antibodies and the correlation analysis was performed by Sigmaplot after the fluorescent intensity

measurement by Image J. Arrowhead, neurons with high level of HDAC2 intensity; Arrow, neurons with low level of HDAC2 intensity. N=58.

(c) The double immunofluorescence were performed in the 9-month P301L Tau mice brain slices by using the Tau5 (Green) and HDAC2 (Red) antibodies and the correlation analysis was performed by Sigmaplot after the fluorescent intensity measurement by Image J. Arrowhead, neurons with high level of HDAC2 intensity; Arrow, neurons with low level of HDAC2 intensity. N=55.

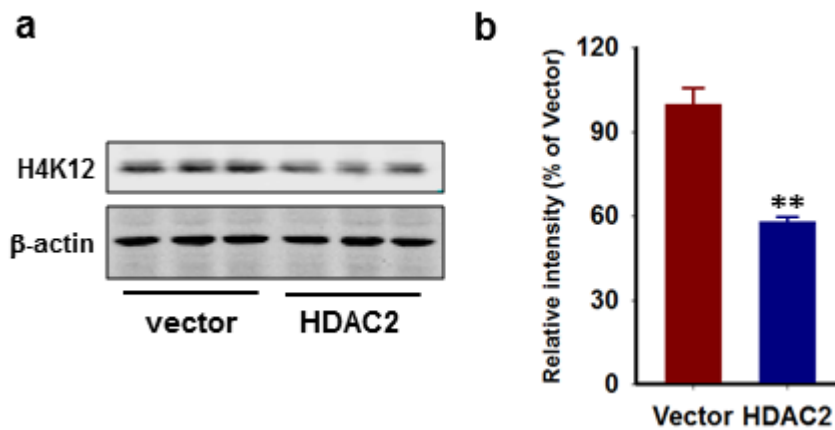

**Fig. S2. Overexpression of HDAC2 reduces the acetylation of histone 4 at lysine 12 site.**

(a, b) The hippocampal neurons were cultured to 14 DIV and then infected with lenti-HDAC2 (HDAC2) or vector control (vector) viruses. 48 hours later, the neurons were harvest and the cell lysates were used for western blot by the indicated antibodies. The representative images were shown in (a) and the quantitative analysis were performed (b). \*\*  $P < 0.01$ , vs. Vector. N=4.

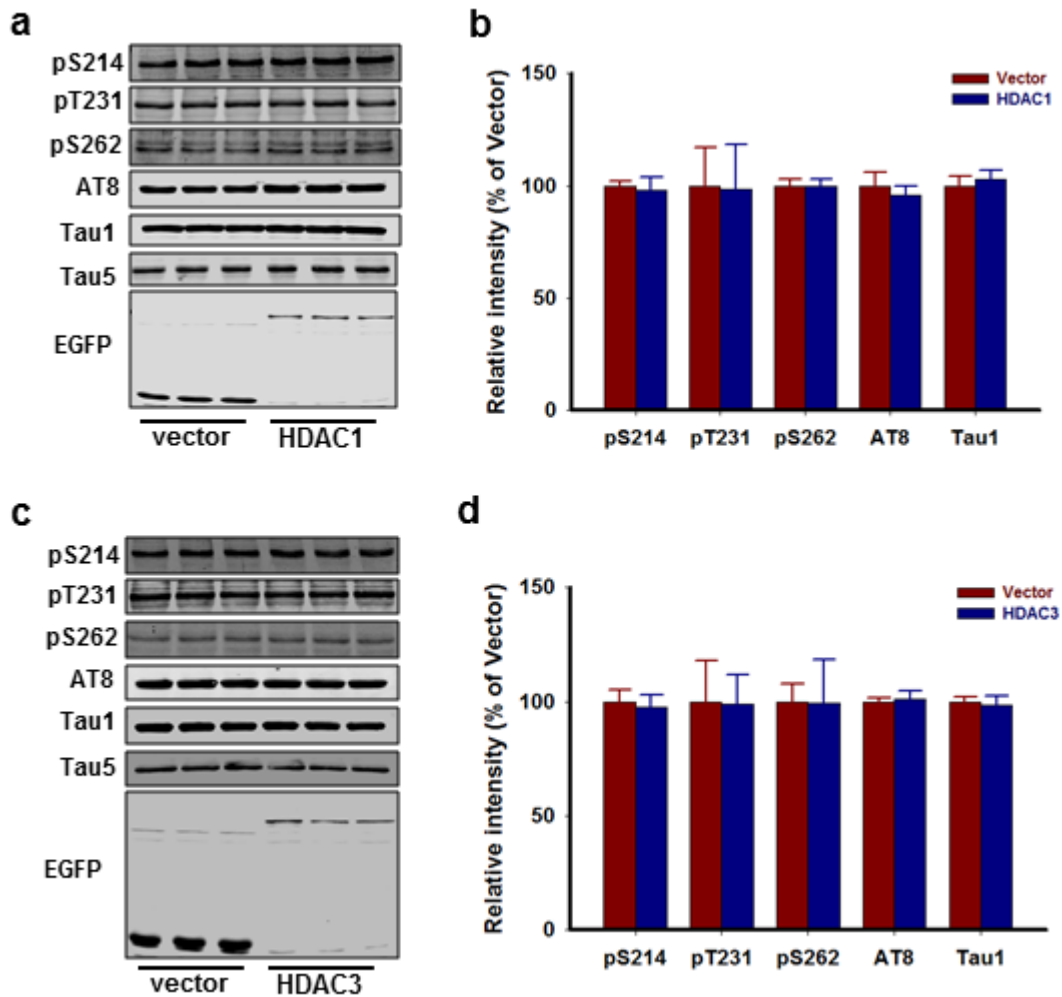

**Fig. S3. Overexpression HDAC1 or HDAC3 does not induce the tauopathy *in vitro***

(a, b) The hippocampal neurons were cultured to 14 DIV and then infected with lenti-HDAC1 (HDAC1) or vector control (vector) viruses. 48 hours later, the neurons were harvest and the cell lysates were used for western blot by the indicated antibodies pS214, pT231, pS262, AT8, Tau1 and Tau5. The representative blots were shown in (a) and the quantitative analysis were performed in (b).

(c, d) The hippocampal neurons were cultured to 14 DIV and then infected with lenti-HDAC3 (HDAC3) or vector control (vector) viruses. 48 hours later, the neurons

were harvest and the cell lysates were used for western blot by the indicated antibodies pS214, pT231, pS262, AT8, Tau1 and Tau5. The representative blots were shown in (c) and the quantitative analysis were performed in (d).

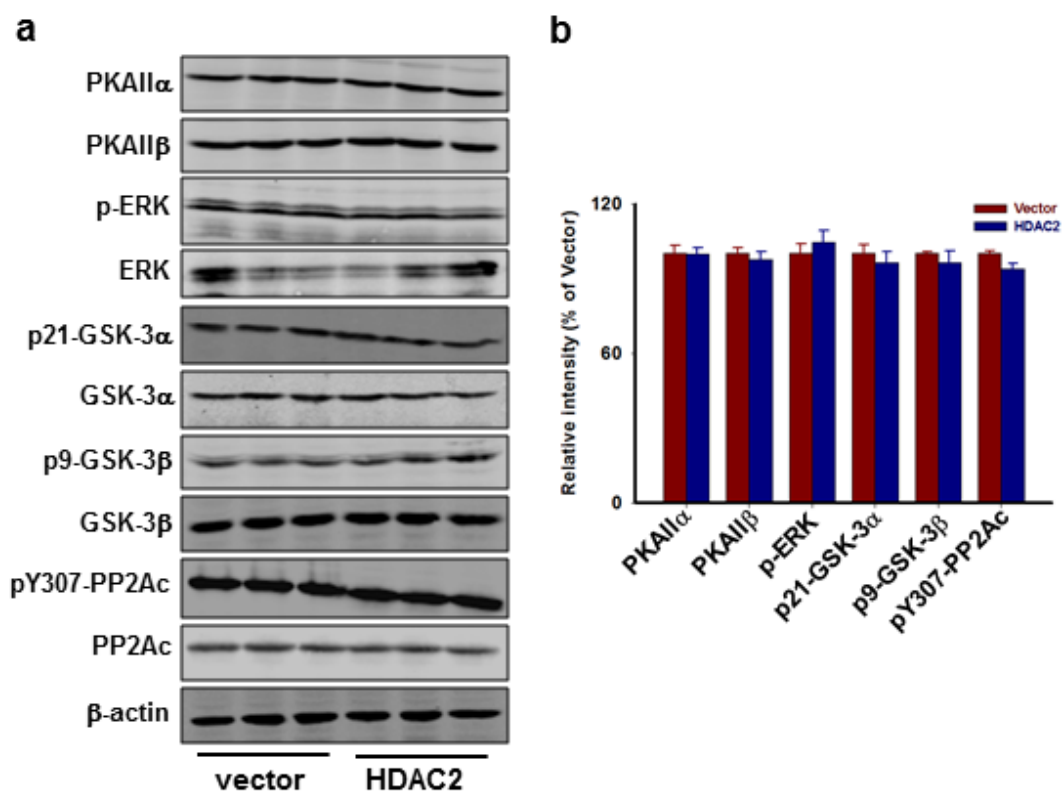

**Fig. S4. Overexpression HDAC2 does not alter the activities of PKA, ERK, GSK-3 $\alpha$ / $\beta$  and PP2Ac *in vitro***

(a, b) The hippocampal neurons were cultured to 14 DIV and then infected with lenti-HDAC2 (HDAC2) or vector control (vector) viruses. 48 hours later, the neurons were harvest and the cell lysates were used for western blot by the indicated antibodies above. The representative blots were shown in (a) and the quantitative analysis were performed in (b).

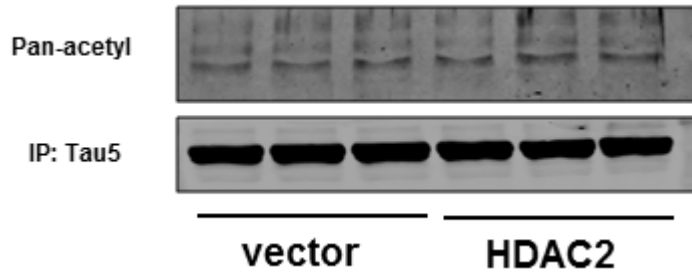

**Fig. S5. Overexpression HDAC2 does not alter the acetylation of tau *in vitro***

The hippocampal neurons were cultured to 14 DIV and then infected with lenti-HDAC2 (HDAC2) or vector control (vector) viruses. 48 hours later, the neurons were harvest and the cell lysates were immunoprecipitated with Tau 5 and then the pellets were immunoblotted by pan-acetylation antibody.

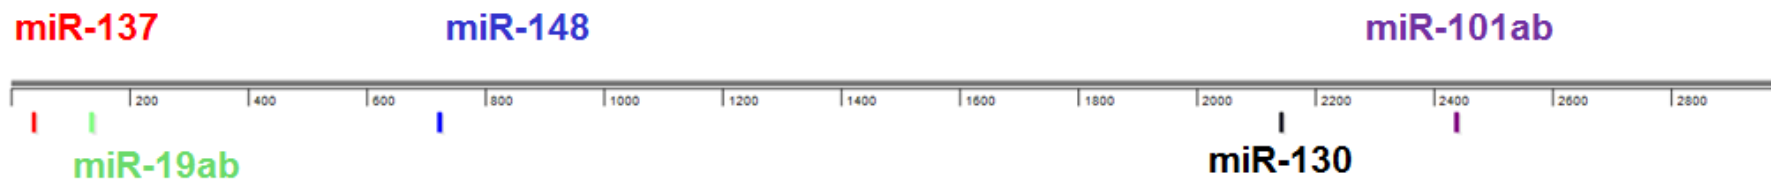

**Fig. S6. The predicted binding sites of miRNAs in the 3'UTR of *PRKAA1*.**

The 3'UTR sequence of *PRKAA1* was input to the Seqbuilder (Lasergene 7.0) and the different binding sites of predicted miRNAs were indicated.

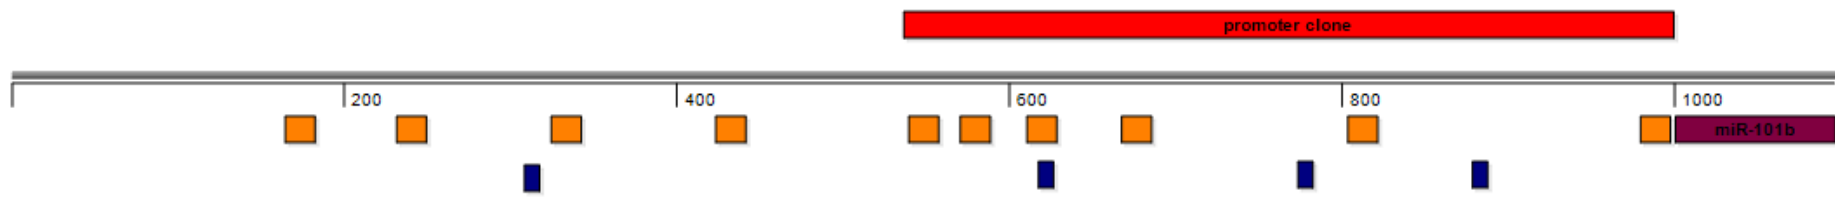

**Fig. S7. The predicted binding sites of HNF-4A and Sox5 transcription factor in the upstream of pri-miR-101b.**

The upstream 1000 bp sequence of pri-miR-101b was input to the Seqbuilder (Lasergene 7.0). The pri-miR-101b was labeled as purple color; the

cloned promoter sequence in luciferase experiment was labeled as red color. The predicted HNF-4A and Sox5 binding motifs were labeled as yellow color and blue color separately.



Supplementary Table 1: Potential binding sites of miR-101 promoter region that predicted by Motifmap

| Location                 | +/- | BBS   | BLS   | NLOD  | Z-Score | FDR   | Motif ID | TF Name    | Gene    | Distance | Region   |
|--------------------------|-----|-------|-------|-------|---------|-------|----------|------------|---------|----------|----------|
| chr19:29209757..29209763 | +   | 6.183 | 7.815 | 1     | 3.683   | 0.176 | M01033   | HNF4       | Mir101b | -11      | Upstream |
| chr19:29209667..29209687 | -   | 0     | 0.161 | 0.789 | 4.302   | 0.444 | M01655   | P53        | Mir101b | -81      | Upstream |
| chr19:29209634..29209640 | -   | 1.049 | 2.613 | 1     | 4.476   | 0.471 | MA0004   | Arnt       | Mir101b | -128     | Upstream |
| chr19:29209634..29209640 | +   | 1.049 | 2.613 | 1     | 4.476   | 0.471 | MA0004   | Arnt       | Mir101b | -134     | Upstream |
| chr19:29209495..29209503 | +   | 2.113 | 3.181 | 1     | 4.232   | 0.012 | M00712   | myogenin   | Mir101b | -273     | Upstream |
| chr19:29209295..29209305 | +   | 1.764 | 2.828 | 1     | 4.02    | 0.082 | M01734   | NFAT3      | Mir101b | -473     | Upstream |
| chr19:29209146..29209152 | -   | 1.236 | 2.453 | 1     | 4.476   | 0.477 | MA0004   | Arnt       | Mir101b | -616     | Upstream |
| chr19:29209146..29209152 | +   | 1.236 | 2.453 | 1     | 4.476   | 0.477 | MA0004   | Arnt       | Mir101b | -622     | Upstream |
| chr19:29209105..29209125 | +   | 0     | 0.512 | 0.817 | 4.512   | 0.213 | M01200   | CTCF       | Mir101b | -663     | Upstream |
| chr19:29209006..29209013 | +   | 3.06  | 5.394 | 1     | 3.688   | 0.495 | M01131   | SOX10      | Mir101b | -762     | Upstream |
| chr19:29208765..29208777 | -   | 0.007 | 0.161 | 0.91  | 4.421   | 0.363 | MA0141   | Esrrb      | Mir101b | -991     | Upstream |
| chr19:29208762..29208774 | -   | 0.012 | 0.161 | 0.909 | 4.537   | 0.081 | M01589   | ERR2 (ESF) | Mir101b | -994     | Upstream |
| chr19:29208765..29208771 | -   | 4.625 | 5.435 | 1     | 3.591   | 0.058 | M01032   | HNF4       | Mir101b | -997     | Upstream |
| chr19:29208617..29208623 | -   | 1.666 | 2.566 | 1     | 3.683   | 0.171 | M01033   | HNF4       | Mir101b | -1145    | Upstream |
| chr19:29208539..29208546 | -   | 0.927 | 1.314 | 1     | 4.148   | 0.087 | M00468   | AP-2rep    | Mir101b | -1222    | Upstream |
| chr19:29208536..29208542 | -   | 0.978 | 1.314 | 1     | 3.683   | 0.171 | M01033   | HNF4       | Mir101b | -1226    | Upstream |
| chr19:29208253..29208261 | -   | 1.402 | 1.675 | 1     | 3.771   | 0.379 | M00494   | STAT6      | Mir101b | -1507    | Upstream |
| chr19:29208197..29208204 | -   | 1.365 | 1.513 | 1     | 3.958   | 0     | MA0087   | SOX5       | Mir101b | -1564    | Upstream |
| chr19:29208096..29208111 | +   | 0.012 | 0.541 | 0.843 | 4.377   | 0.413 | M00495   | Bach1      | Mir101b | -1672    | Upstream |
| chr19:29208091..29208100 | +   | 0.008 | 0.161 | 0.941 | 4.398   | 0.154 | M01139   | LMAF       | Mir101b | -1677    | Upstream |
| chr19:29208083..29208095 | +   | 0.396 | 0.996 | 0.963 | 4.68    | 0.125 | M01142   | LRH1       | Mir101b | -1685    | Upstream |
| chr19:29207921..29207935 | +   | 0.003 | 0.161 | 0.881 | 4.42    | 0.368 | M01185   | BCL6       | Mir101b | -1847    | Upstream |

Supplementary Table 2. Potential binding sites of miR-101 promoter region that predicted by TFbind

Supplementary Table 3. Primary antibodies used in current study

| Antibodies                       | Type | WB dilution | IHC dilution | References and sources            |
|----------------------------------|------|-------------|--------------|-----------------------------------|
| Tau1                             | mAb  | -           | 1:200        | Millipore (Billerica, MA, USA)    |
| AT8                              | mAb  | -           | 1:100        | Thermo                            |
| HDAC2                            | mAb  | 1:1000      | 1:100        | Abcam (Cambridge, UK)             |
| pT231                            | pAb  | 1:1000      | -            | SAB (Pearland, TX, USA)           |
| pS214                            | pAb  | 1:500       | -            | SAB (Pearland, TX, USA)           |
| pT262                            | pAb  | 1:500       | -            | SAB (Pearland, TX, USA)           |
| Tau5                             | mAb  | 1:1000      | -            | Thermo                            |
| EGFP                             | pAb  | 1:1000      | -            | Abcam (Cambridge, UK)             |
| DM1A                             | mAb  | 1:1000      | -            | Sigma (St. Louis, MO, USA)        |
| GSK-3 $\beta$                    | pAb  | 1:1000      | -            | SAB (Pearland, TX, USA)           |
| pS9-GSK-3 $\beta$                | pAb  | 1:1000      | -            | Cell Signaling (Danvers, MA, USA) |
| GSK-3 $\alpha$                   | pAb  | 1:1000      | -            | SAB (Pearland, TX, USA)           |
| pS21-GSK-3 $\alpha$              | pAb  | 1:1000      | -            | Cell Signaling (Danvers, MA, USA) |
| PP2ac                            | mAb  | 1:1000      | -            | Millipore (Billerica, MA, USA)    |
| pY307-PP2ac                      | pAb  | 1:1000      | -            | Abcam (Cambridge, UK)             |
| Ace-H4K12                        | pAb  | 1:1000      | -            | Abcam (Cambridge, UK)             |
| CDK5                             | mAb  | 1:1000      | -            | Santa Cruz, CA, USA               |
| P35/25                           | pAb  | 1:1000      | -            | Santa Cruz, CA, USA               |
| PKA $\alpha$                     | pAb  | 1:1000      | -            | Santa Cruz, CA, USA               |
| PKA $\beta$                      | pAb  | 1:1000      | -            | Santa Cruz, CA, USA               |
| p-ERK                            | pAb  | 1:1000      | -            | Cell Signaling (Danvers, MA, USA) |
| ERK                              | pAb  | 1:1000      | -            | Cell Signaling (Danvers, MA, USA) |
| Pan-acetylation                  | pAb  | 1:1000      | -            | Cell Signaling (Danvers, MA, USA) |
| HNF-4A                           | pAb  | 1:1000      | -            | Sigma (St. Louis, MO, USA)        |
| pS304-HNF-A                      | pAb  | 1:500       | -            | SAB (Pearland, TX, USA)           |
| AMPK                             | pAb  | 1:1000      | -            | Abcam (Cambridge, UK)             |
| Goat-anti- mouse<br>-peroxidase  | -    | 1:5,000     | -            | Pierce Chemical Company           |
| Goat-anti- rabbit<br>-peroxidase | -    | 1:5,000     | -            | Pierce Chemical Company           |
